# Supplementary material for: Second Generation DNA Methylation Age Predicts Cognitive Change in Midlife: The Moderating Role of Childhood Socioeconomic Status
Source: Research Square preprint supplement (doi:10.21203/rs.3.rs-5551592/v1), 2024-12-23
Supplement: Supplementary file 1 [file 7431d933fa4c21dfe86d847c.docx]

**Supporting Information**

Second Generation DNA Methylation Age Predicts Cognitive Change in Midlife: The Moderating Role of Childhood Socioeconomic Status

Sophie A. Bell1*, Christopher R. Beam2,3, Ebrahim Zandi4, Alyssa Kam2, Emily Andrews1, Jonathan Becker5, Deborah Finkel6,7, Deborah W. Davis8,9, Eric Turkheimer1*

1Department of Psychology, University of Virginia

2Department of Psychology, University of Southern California

3 Davis School of Gerontology, University of Southern California

4Keck School of Medicine, University of Southern California

5Department of Family and Geriatric Medicine, University of Louisville School of Medicine

6 Institute for Gerontology, Jönköping University

7Center for Economic and Social Research, University of Southern California

8 Department of Pediatrics, University of Louisville School of Medicine

9Norton Children’s Research Institute affiliated with the University of Louisville School of Medicine

*Corresponding authors: Sophie Bell and Eric Turkheimer

**Email:**  [bvf7pa@virginia.edu](mailto:bvf7pa@virginia.edu) and [ent3c@virginia.edu](mailto:ent3c@virginia.edu)

**This file includes:**

Figures S1 to S3

Tables S1 to S4


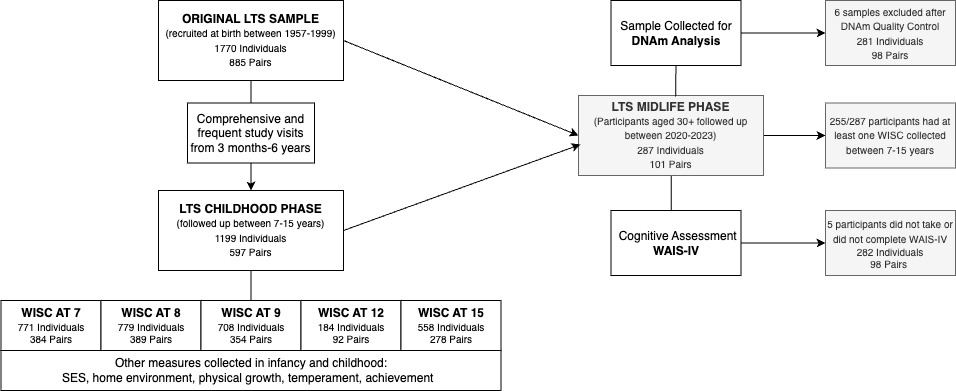


Fig. S1. Participant Flow Diagram from the Louisville Twin Study.


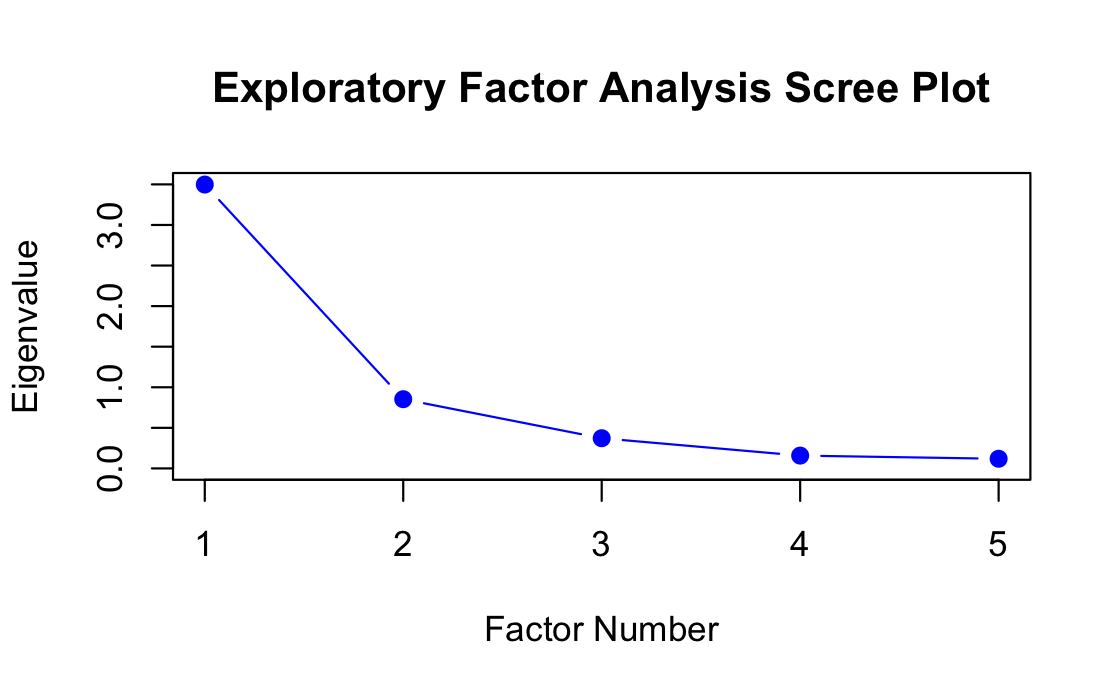
Fig. S2. Scree Plot of Eigenvalues.


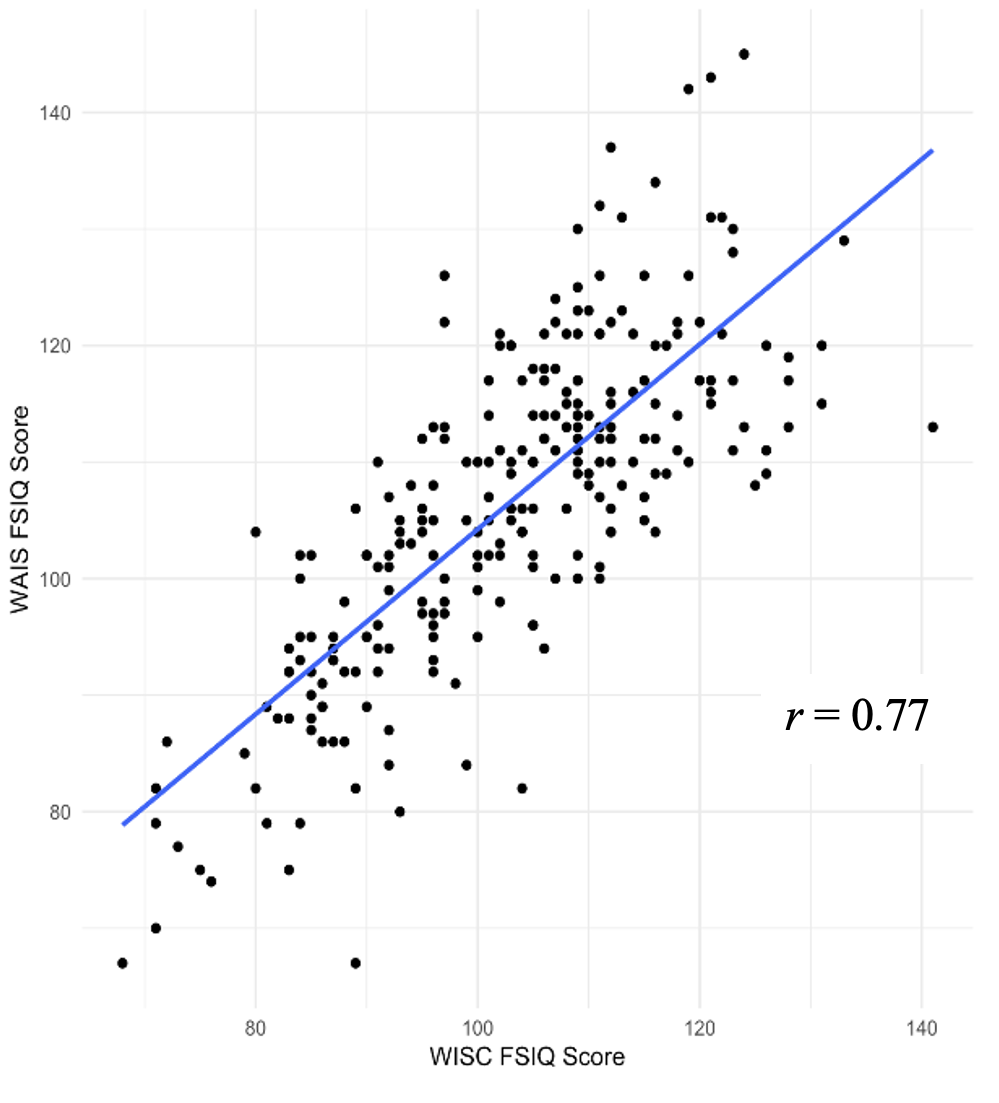


Fig. S3. Relationship between Childhood and Midlife IQ Scores.

Table S1. Pairwise correlations between DNAmAge measures.

| **DNAmAge Measures** | **Horvath** | **Horvath Skin and Blood** | **Hannum** | **PhenoAge** | **GrimAge** |
| --- | --- | --- | --- | --- | --- |
| **Horvath** | _ |  |  |  |  |
| **Horvath Skin and Blood** | 0.86 | _ |  |  |  |
| **Hannum** | 0.87 | 0.84 | _ |  |  |
| **PhenoAge** | 0.57 | 0.60 | 0.61 | _ |  |
| **GrimAge** | 0.37 | 0.44 | 0.39 | 0.58 | _ |

Correlations were estimated after DNAmAge values were adjusted for age and cell composition and were winsorized for values more than two standard deviations above or below the mean. All correlations were statistically significant at p<.001.

Table S2. Standardized DNAmAge Measure ACE decompositions.

| ACE Model | Horvath  *Estimate (SE)* | Horvath  Skin & Blood | Hannum | PhenoAge | GrimAge | Factor 1 | Factor 2 |
| --- | --- | --- | --- | --- | --- | --- | --- |
| A | 0.60 (0.07) | 0.61 (0.07) | 0.57 (0.08) | 0.23 (0.29) | 0.73 (0.06) | 0.50 (0.33) | 0.60 (0.28) |
| C | 0.00 (0.00)* | 0.00 (0.00)* | 0.00 (0.00)* | 0.33 (0.25) | 0.00 (0.00)* | 0.08 (0.30) | 0.09 (0.26) |
| E | 0.40 (0.07) | 0.39 (0.07) | 0.43 (0.08) | 0.45 (0.09) | 0.27 (0.06) | 0.42 (0.08) | 0.31 (0.06) |

A, additive genetic variance; C, shared genetic variance; E, nonshared environmental variance; SE, standard error estimate.

*C is set to zero because variance estimated as negative

Table S3. Results of the Exploratory Factor Analysis

| DNAmAge Measure | Gen 1  *Loading (SE)* | Gen 2  *Loading (SE)* |
| --- | --- | --- |
| Horvath | **1.00 (0.05)** | -0.10 (0.07) |
| Horvath Skin and Blood | **0.88 (0.03)** | 0.06 (0.06) |
| Hannum | **0.92 (0.01)** | 0.00 (0.00) |
| PhenoAge | 0.30 (0.16) | **0.59 (0.18)** |
| GrimAge | 0.00 (0.00) | **0.77 (0.12)** |

Bolded values indicate statistical significance at p < .05. The correlation between Gen 1 and Gen 2 is 0.57 (0.12), p < .05.

**Table S4.** Phenotypic and Quasi-Causal Regression Model Results for Gen 1 DNAmAge

| **Gen 1 DNAmAge** | | | | | | |
| --- | --- | --- | --- | --- | --- | --- |
|  |  | **Childhood IQ**  Estimate (SE) |  | **DNAmAge**  Estimate (SE) |  | **Adult IQ**  Estimate (SE) |
| **Phenotypic Association Model** | **SES** | | | | | |
| ***b*** | 0.56 (0.09)** | ***b*** | -0.14 (0.22) | ***b*** | 0.16 (0.07)* |
| **Childhood IQ** | | | | | |
|  | _ | ***bA2*** | _ | ***bA1*** | _ |
|  | _ | ***bC2*** | _ | ***bC1*** | _ |
|  | _ | ***bP2*** | 0.03 (0.15) | ***bP1*** | 0.71 (0.05)** |
| **DNAmAge** | | | | | |
|  | _ |  | _ | ***bA3*** | _ |
|  | _ |  | _ | ***bC3*** | _ |
|  | _ |  | _ | ***bP3*** | -0.01 (0.02) |
| **DNAmAge X SES** | | | | | |
|  |  |  |  | ***bint*** | 0.01 (0.02) |
| **Variances** | | | | | |
| **A** | 1.15 (0.34) |  | 5.75 (0.93) |  | 0.50 (0.09) |
| **C** | 0.12 (0.32) |  | 0.00 (0.00)† |  | 0.00 (0.00)† |
| **E** | 0.22 (0.04) |  | 2.15 (0.45) |  | 0.27 (0.05) |
| **Quasi-Causal Regression Model** | **SES** | | | | | |
| ***b*** | 0.56 (0.09)** | ***b*** | -0.13 (0.11) | ***b*** | 0.32 (0.11)* |
| **Childhood IQ** | | | | | |
|  | _ | ***bA2*** | -0.05 (0.66) | ***bA1*** | 0.33 (0.23) |
|  | _ | ***bC2*** | 0.36 (1.21) | ***bC1*** | 0.61 (0.48) |
|  | _ | ***bP2*** | 0.02 (0.45) | ***bP1*** | 0.41 (0.14)* |
| **DNAmAge** | | | | | |
|  | _ |  | _ | ***bA3*** | -0.01 (0.08) |
|  | _ |  | _ | ***bC3*** | 0.00 (0.00) |
|  | _ |  | _ | ***bP3*** | 0.00 (0.05) |
| **DNAmAge X SES** | | | | | |
|  |  |  |  | ***bint*** | 0.01 (0.02) |
| **Variances** | | | | | |
| **A** | 1.03 (0.29) |  | 5.71 (0.95) |  | 0.46 (0.10) |
| **C** | 0.22 (0.28) |  | 0.00 (0.00)† |  | 0.00 (0.00)† |
| **E** | 0.23 (0.04) |  | 2.15 (0.45) |  | 0.26 (0.05) |
| bP, phenotypic association between predictor and outcome; bA, amount of variance attributable to additive genetic influences; bC, amount of variance attributable to shared environmental experiences; bint, estimate of the interaction effect. Data are presented as unstandardized regression coefficients with standard errors in parentheses. †C variances have been set to zero *p <.05 **p≤ .001 | | | | | | |
